# Supplementary material for: Effect of a Community-Based Hepatitis B Virus Infection Detection Combined with Vaccination Program in China
Source: MDPI journal article supplement (doi:10.3390/vaccines10010019), 2021-12-24

**File S2 Sensitivity analysis of the association between HBVIDV program and serological evidence of vaccine-mediated immunity**

**Table S1.** Characteristic of total sample, original sample, propensity score-matched sample, and inverse probability of treatment-weighted sample

**Table S2.** Association between HBVIDV program and vaccine-mediated immunity

**Table S3.** Association between HBVIDV program and vaccine-mediated immunity in original sample, stratified by age and living area

**Table S4.** Association between HBVIDV program and vaccine-mediated immunity in propensity score-matched sample, stratified by age and living area

**Table S5.** Association between HBVIDV program and vaccine-mediated immunity in Inverse probability of treatment-weighted sample, stratified by age and living area

**Figure S1.** Flowchart of study participant selection for HBVIDV program from July 2019 to June 2020.

**Table S1.** Characteristic of total sample, original sample, propensity score-matched sample, and inverse probability of treatment-weighted sample

| Characteristic                    | Total sample<br>(N=48063) | Original sample    |                    |       | Propensity 1:1 Matching |                    |       | IPTW sample        |                 |       |
|-----------------------------------|---------------------------|--------------------|--------------------|-------|-------------------------|--------------------|-------|--------------------|-----------------|-------|
|                                   |                           | Treatment          | Control            | SMD   | Treatment               | Control            | SMD   | Treatment          | Control group   | SMD   |
|                                   |                           | group<br>(N=11540) | group<br>(N=36523) |       | group<br>(N=11063)      | group<br>(N=11063) |       | group<br>(N=11540) | (N=36523)       |       |
| Age                               |                           |                    |                    | 0.362 |                         |                    | 0.025 |                    |                 | 0.003 |
| 18–34                             | 5712 (11.9)               | 551 (4.8)          | 5161 (14.1)        |       | 551 (5.0)               | 599 (5.4)          |       | 4462.5 (9.1)       | 5885.3 (12.3)   |       |
| 35–44                             | 6032 (12.6)               | 1283 (11.1)        | 4749 (13.0)        |       | 1283 (11.6)             | 1259 (11.4)        |       | 7926.4 (16.2)      | 5761.3 (12.1)   |       |
| 45–54                             | 11075 (23.0)              | 2509 (21.7)        | 8566 (23.5)        |       | 2509 (22.7)             | 2531 (22.9)        |       | 12309.5 (25.2)     | 11034.6 (23.1)  |       |
| 55–64                             | 16792 (34.9)              | 4345 (37.7)        | 12447 (34.1)       |       | 4171 (37.7)             | 4311 (39.0)        |       | 15782.7 (32.2)     | 16988.7 (35.6)  |       |
| ≥65                               | 8452 (17.6)               | 2852 (24.7)        | 5600 (15.3)        |       | 2549 (23.0)             | 2353 (21.4)        |       | 8466.1 (17.3)      | 8088.3 (16.9)   |       |
| Gender, male                      | 18553 (38.6)              | 4131 (35.8)        | 14422 (39.5)       | 0.076 | 4002 (36.2)             | 3933 (35.6)        | 0.013 | 18543.8 (37.9)     | 184119.4 (38.6) | 0.014 |
| Education level                   |                           |                    |                    | 0.221 |                         |                    | 0.042 |                    |                 | 0.050 |
| Illiterate                        | 1007 (2.1)                | 252 (2.2)          | 755 (2.1)          |       | 252 (2.3)               | 262 (2.4)          |       | 846.1 (1.7)        | 1065.7 (2.2)    |       |
| Primary school/Junior high school | 17415 (36.2)              | 5172 (44.8)        | 12243 (33.5)       |       | 5172 (46.8)             | 5067 (45.8)        |       | 17339.6 (35.4)     | 17265.2 (36.2)  |       |
| Senior high school                | 11397 (23.7)              | 2580 (15.9)        | 8817 (24.1)        |       | 2580 (23.3)             | 2764 (25.0)        |       | 11075.6 (22.6)     | 11651.4 (24.4)  |       |
| College graduate or above         | 8619 (17.9)               | 1839 (15.9)        | 6780 (18.6)        |       | 1839 (16.6)             | 1940 (17.5)        |       | 9445.9 (19.3)      | 8591.2 (18.0)   |       |
| Missing                           | 9625 (20.0)               | 1697 (14.7)        | 7928 (21.7)        |       | 1220 (11.0)             | 1030 (9.3)         |       | 10240.0 (20.9)     | 9184.6 (19.2)   |       |
| Employment condition              |                           |                    |                    | 0.290 |                         |                    | 0.025 |                    |                 | 0.056 |
| Working                           | 19939 (40.2)              | 3803 (33.0)        | 15536 (42.5)       |       | 3803 (34.4)             | 4240 (38.3)        |       | 15143.4 (30.9)     | 20490.0 (42.9)  |       |
| Retired                           | 16580 (34.5)              | 5765 (50.0)        | 10815 (29.6)       |       | 5288 (47.8)             | 5014 (45.3)        |       | 19233.7 (39.3)     | 15280.4 (32.0)  |       |
| Unemployed                        | 3108 (6.5)                | 930 (8.1)          | 2178 (6.0)         |       | 930 (8.4)               | 773 (7.0)          |       | 5068.3 (10.4)      | 2732.7 (5.7)    |       |
| Student                           | 78 (0.2)                  | 12 (0.1)           | 66 (0.2)           |       | 12 (0.1)                | 6 (0.1)            |       | 94.3 (0.2)         | 70.6 (0.2)      |       |
| Missing                           | 8958 (18.6)               | 1030 (8.9)         | 7928 (21.7)        |       | 1030 (9.3)              | 1030 (9.3)         |       | 9407.6 (19.2)      | 9184.6 (19.2)   |       |

Continued

| Table S1 Continued              |                           |                                 |                            |       |                                 |                               |       |                                 |                                   |
|---------------------------------|---------------------------|---------------------------------|----------------------------|-------|---------------------------------|-------------------------------|-------|---------------------------------|-----------------------------------|
| Characteristic                  | Total sample<br>(N=48063) | Original sample                 |                            |       | Propensity 1:1 Matching         |                               |       | IPTW sample                     |                                   |
|                                 |                           | Treatment<br>group<br>(N=11540) | Control group<br>(N=36523) | SMD   | Treatment<br>group<br>(N=11063) | Control<br>group<br>(N=11063) | SMD   | Treatment<br>group<br>(N=11540) | Control group<br>(N=36523)<br>SMD |
| Economic level                  |                           |                                 |                            | 0.179 |                                 |                               | 0.055 |                                 | 0.044                             |
| Far below average               | 2261 (4.7)                | 511 (4.4)                       | 1750 (4.8)                 |       | 511 (4.6)                       | 574 (5.2)                     |       | 1969.8 (4.0)                    | 2388.6 (5.0)                      |
| Below average                   | 7175 (14.9)               | 1999 (17.3)                     | 5176 (14.2)                |       | 1999 (18.1)                     | 1874 (16.9)                   |       | 7978.7 (15.7)                   | 7032.7 (14.7)                     |
| Average                         | 27911 (58.1)              | 7091 (61.5)                     | 20820 (57.0)               |       | 7091 (64.1)                     | 7359 (66.5)                   |       | 28061 (57.3)                    | 28047.7 (58.7)                    |
| Above average                   | 974 (2.0)                 | 208 (1.8)                       | 766 (2.1)                  |       | 208 (1.9)                       | 208 (1.9)                     |       | 851.9 (1.7)                     | 995.2 (2.1)                       |
| Far above average               | 119 (0.3)                 | 30 (0.3)                        | 89 (0.2)                   |       | 30 (0.3)                        | 20 (0.2)                      |       | 103.7 (0.2)                     | 116.2 (0.2)                       |
| Missing                         | 9623 (20.0)               | 1701 (14.7)                     | 7922 (21.7)                |       | 1224 (11.1)                     | 1025 (9.3)                    |       | 10282.1 (21.0)                  | 9177.9 (19.2)                     |
| Self-rated socioeconomic status |                           |                                 |                            | 0.177 |                                 |                               | 0.059 |                                 | 0.047                             |
| Higher                          | 1006 (2.1)                | 244 (2.1)                       | 762 (2.1)                  |       | 244 (2.2)                       | 250 (2.3)                     |       | 967.4 (2.0)                     | 1023.6 (2.1)                      |
| Equality                        | 30056 (62.5)              | 7708 (66.8)                     | 22348 (61.2)               |       | 7708 (69.7)                     | 7905 (71.5)                   |       | 30024.5 (61.3)                  | 30157.5 (63.2)                    |
| Lower                           | 7346 (15.3)               | 1877 (16.3)                     | 5469 (15.0)                |       | 1877 (17.0)                     | 1870 (16.9)                   |       | 7628.0 (15.6)                   | 7363.4 (15.4)                     |
| Missing                         | 9655 (20.1)               | 1711 (14.8)                     | 7944 (21.8)                |       | 1234 (11.2)                     | 1038 (9.4)                    |       | 10327.3 (21.1)                  | 9213.7 (19.3)                     |
| Living area                     |                           |                                 |                            | 0.496 |                                 |                               | 0.004 |                                 | 0.023                             |
| Urban                           | 19897 (41.4)              | 2759 (23.9)                     | 17138 (46.9)               |       | 2759 (24.9)                     | 2740 (24.8)                   |       | 19794.4 (40.4)                  | 19858.2 (41.6)                    |
| Rural                           | 28166 (58.6)              | 8781 (76.1)                     | 19385 (53.1)               |       | 8304 (75.1)                     | 8323 (75.2)                   |       | 29152.8 (59.6)                  | 27900 (58.4)                      |
| Multimorbidity                  |                           |                                 |                            | 0.154 |                                 |                               | 0.058 |                                 | 0.047                             |
| Yes                             | 8177 (17.0)               | 2881 (25.0)                     | 5296 (14.5)                |       | 6955 (62.9)                     | 7136 (64.5)                   |       | 8721.2 (17.8)                   | 8175.9 (17.1)                     |
| No                              | 30248 (62.9)              | 6955 (60.3)                     | 23293 (63.8)               |       | 2881 (26.0)                     | 2891 (26.1)                   |       | 29927.0 (61.1)                  | 30379.9 (63.6)                    |
| Missing                         | 9638 (20.1)               | 1704 (14.8)                     | 7934 (21.7)                |       | 1227 (11.1)                     | 1036 (9.4)                    |       | 10299.1 (21.0)                  | 9202.4 (19.3)                     |

Continued

| Table S1 Continued |                |                           |                                 |                            |       |                                 |                            |       |                                 |                            |       |
|--------------------|----------------|---------------------------|---------------------------------|----------------------------|-------|---------------------------------|----------------------------|-------|---------------------------------|----------------------------|-------|
| Characteristic     |                | Total sample<br>(N=48063) | Original sample                 |                            |       | Propensity 1:1 Matching         |                            |       | IPTW sample                     |                            |       |
|                    |                |                           | Treatment<br>group<br>(N=11540) | Control group<br>(N=36523) | SMD   | Treatment<br>group<br>(N=11063) | Control group<br>(N=11063) | SMD   | Treatment<br>group<br>(N=11540) | Control group<br>(N=36523) | SMD   |
| Self-rated         | health         |                           |                                 |                            | 0.203 |                                 |                            | 0.057 |                                 |                            | 0.038 |
|                    | condition      |                           |                                 |                            |       |                                 |                            |       |                                 |                            |       |
|                    | Very unhealthy | 1001 (2.1)                | 241 (2.1)                       | 760 (2.1)                  |       | 241 (2.2)                       | 272 (2.5)                  |       | 813.2 (1.7)                     | 1070.0 (2.2)               |       |
|                    | Unhealthy      | 2637 (5.5)                | 726 (6.3)                       | 1911 (5.2)                 |       | 726 (6.6)                       | 719 (6.5)                  |       | 2693.6 (5.5)                    | 2637.5 (5.5)               |       |
|                    | Fair healthy   | 12390 (25.8)              | 3640 (31.5)                     | 8750 (24.0)                |       | 3640 (32.9)                     | 3727 (33.7)                |       | 13507.7 (27.6)                  | 12258.9 (25.7)             |       |
|                    | Healthy        | 17858 (37.2)              | 4226 (36.6)                     | 13623 (37.3)               |       | 4226 (38.2)                     | 4345 (39.3)                |       | 17048.1 (34.8)                  | 18143.6 (38.0)             |       |
|                    | Very healthy   | 4522 (9.4)                | 996 (8.6)                       | 3526 (9.7)                 |       | 996 (9.0)                       | 962 (8.7)                  |       | 4557.9 (9.3)                    | 4434.4 (9.3)               |       |
|                    | Missing        | 9655 (20.1)               | 1711 (14.8)                     | 7944 (21.8)                |       | 1234 (11.2)                     | 1038 (9.4)                 |       | 10327.3 (21.1)                  | 9213.7 (19.3)              |       |

Abbreviations: SMD, standard mean difference; IPTW, inverse probability of treatment weighting;

Categorical variables are reported as number (%).

**Table S2.** Association between HBVIDV program and vaccine-mediated immunity

|                                             | <b>Treatment group</b> | <b>Control group</b> | <b>OR (95% CI)</b>  | <b><i>p</i> Value</b> |
|---------------------------------------------|------------------------|----------------------|---------------------|-----------------------|
| Original sample unadjusted model            | 4298 (37.2)            | 11155 (30.5)         | 1.350 (1.292,1.410) | <0.0001               |
| Original sample adjusted model <sup>a</sup> | 4298 (37.2)            | 11155 (30.5)         | 1.579 (1.506,1.656) | <0.0001               |
| Propensity 1:1 Matching                     | 4117 (37.2)            | 3046 (27.5)          | 1.560 (1.474,1.651) | <0.0001               |
| IPTW sample                                 | 19141.5 (39.1)         | 14224.1 (29.8)       | 1.514 (1.474,1.555) | <0.0001               |

Abbreviations: OR (95% CI), Odds Ratio (95% Confidence Interval). IPTW, inverse probability of treatment weighting.

Outcome events (%) are reported.

<sup>a</sup>Model was adjusted for age, gender, educational level, employment condition, economic level, self-rated socioeconomic status, living area, multimorbidity, self-rated health condition.

**Table S3.** Association between HBVIDV program and vaccine-mediated immunity in original sample, stratified by age and living area

|                          | <b>Treatment group<br/>(N=11540)</b> | <b>Control group<br/>(N=36523)</b> | <b>Unadjusted<br/>OR (95% CI)</b> | <b>Adjusted<br/>OR (95% CI)</b> | <b><i>p</i> value</b> | <b><i>p</i> for<br/>interaction</b> |
|--------------------------|--------------------------------------|------------------------------------|-----------------------------------|---------------------------------|-----------------------|-------------------------------------|
| Age <sup>a</sup>         |                                      |                                    |                                   |                                 |                       | <0.0001                             |
| 18–34                    | 318 (57.7)                           | 2493 (48.3)                        | 1.461<br>(1.223,1.745)            | 1.410<br>(1.170,1.700)          | 0.0003                |                                     |
| 35–44                    | 596 (46.5)                           | 1656 (34.9)                        | 1.620<br>(1.430,1.836)            | 1.650<br>(1.446,1.882)          | <0.0001               |                                     |
| 45–54                    | 902 (36.0)                           | 2170 (25.3)                        | 1.655<br>(1.505,1.819)            | 1.778<br>(1.610,1.963)          | <0.0001               |                                     |
| 55–64                    | 1512 (34.8)                          | 3234 (26.0)                        | 1.521<br>(1.421,1.638)            | 1.566<br>(1.447,1.695)          | <0.0001               |                                     |
| ≥65                      | 970 (34.0)                           | 1602 (28.6)                        | 1.286<br>(1.168,1.417)            | 1.358<br>(1.217,1.515)          | <0.0001               |                                     |
| Living area <sup>b</sup> |                                      |                                    |                                   |                                 |                       | <0.0001                             |
| Urban                    | 1010 (36.6)                          | 5596 (32.7)                        | 1.191<br>(1.095,1.295)            | 1.349<br>(1.235,1.472)          | <0.0001               |                                     |
| Rural                    | 3288 (37.4)                          | 5559 (28.7)                        | 1.489<br>(1.412,1.570)            | 1.668<br>(1.576,1.765)          | <0.0001               |                                     |

Outcome events (%) are reported.

<sup>a</sup>Model was adjusted for gender, educational level, employment condition, economic level, self-rated socioeconomic status, living area, multimorbidity, self-rated health condition.

<sup>b</sup>Model was adjusted for age, gender, educational level, employment condition, economic level, self-rated socioeconomic status, multimorbidity, self-rated health condition.

**Table S4.** Association between HBVIDV program and vaccine-mediated immunity in propensity score-matched sample, stratified by age and living area

|             | Treatment group<br>(n=11063) | Control group<br>(n=11063) | OR (95% CI)         | <i>p</i> value | <i>p</i> for interaction |
|-------------|------------------------------|----------------------------|---------------------|----------------|--------------------------|
| Age         |                              |                            |                     |                | <0.0001                  |
| 18–34       | 318 (57.7)                   | 299 (49.9)                 | 1.369 (1.085,1.728) | 0.0081         |                          |
| 35–44       | 596 (46.5)                   | 429 (34.1)                 | 1.678 (1.430,1.970) | <0.0001        |                          |
| 45–54       | 902 (36.0)                   | 601 (23.8)                 | 1.802 (1.594,2.037) | <0.0001        |                          |
| 55–64       | 1440 (34.5)                  | 1093 (25.4)                | 1.552 (1.414,1.705) | <0.0001        |                          |
| ≥65         | 861 (33.8)                   | 624 (26.4)                 | 1.421 (1.257,1.607) | <0.0001        |                          |
| Living area |                              |                            |                     |                | <0.0001                  |
| Urban       | 1010 (36.6)                  | 840 (30.7)                 | 1.306 (1.168,1.461) | <0.0001        |                          |
| Rural       | 3107 (37.4)                  | 2206 (26.5)                | 1.658 (1.552,1.771) | <0.0001        |                          |

Outcome events (%) are reported.

**Table S5.** Association between HBVIDV Program and vaccine-mediated immunity in inverse probability of treatment-weighted sample, stratified by age and living area

|             | Treatment group<br>(n=11540) | Control group<br>(n=36523) | OR (95% CI)         | <i>p</i> value | <i>p</i> for interaction |
|-------------|------------------------------|----------------------------|---------------------|----------------|--------------------------|
| Age         |                              |                            |                     |                | <0.0001                  |
| 18–34       | 2558.4 (57.3)                | 2839.5 (48.3)              | 1.441 (1.333,1.559) | <0.0001        |                          |
| 35–44       | 3806.1 (48.0)                | 1995.9 (34.6)              | 1.743 (1.625,1.869) | <0.0001        |                          |
| 45–54       | 4624.9 (37.6)                | 2757.2 (25.0)              | 1.807 (1.707,1.912) | <0.0001        |                          |
| 55–64       | 5302.8 (33.6)                | 4357.2 (25.7)              | 1.467 (1.399,1.539) | <0.0001        |                          |
| ≥65         | 2849.4 (33.7)                | 2274.4 (28.1)              | 1.297 (1.214,1.386) | <0.0001        |                          |
| Living area |                              |                            |                     |                | <0.0001                  |
| Urban       | 7870.6 (39.8)                | 6430.1 (32.4)              | 1.378 (1.323,1.436) | <0.0001        |                          |
| Rural       | 11270.1 (38.7)               | 7794.1 (27.9)              | 1.626 (1.570,1.684) | <0.0001        |                          |

Outcome events (%) are reported.



**Figure S1.** Flowchart of study participant selection for HBVIDV program from July 2019 to June 2020.

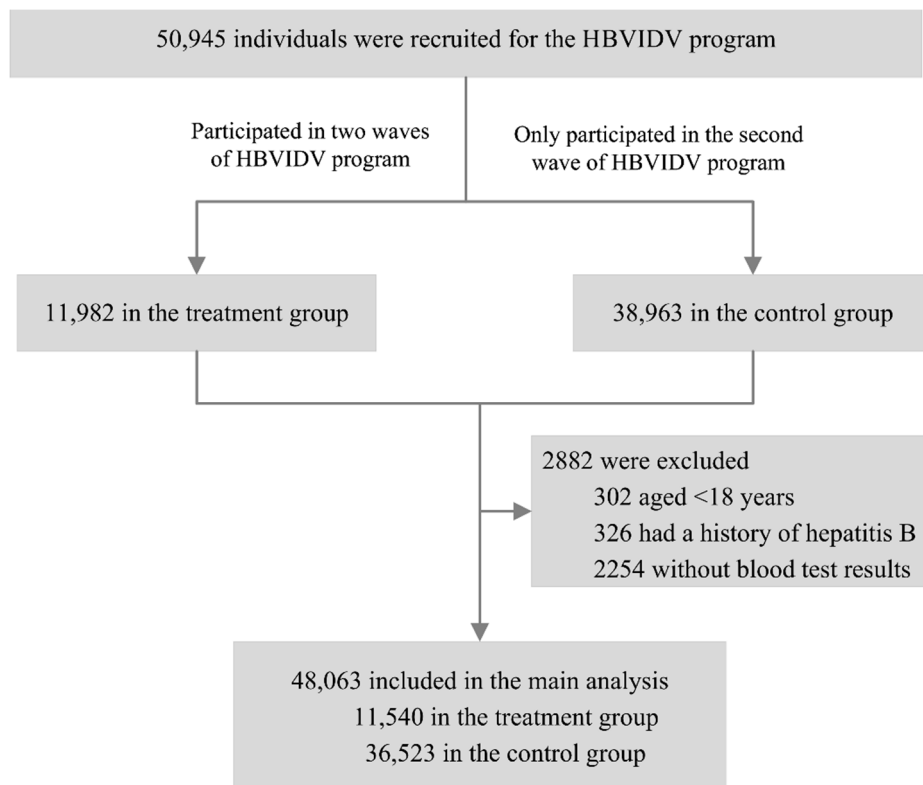

Supplement: s1 [file s1]
