# Supplementary material for: Effect of a Community-Based Hepatitis B Virus Infection Detection Combined with Vaccination Program in China
Source: MDPI journal article supplement (doi:10.3390/vaccines10010019), 2021-12-24
Supplement: s1 [file s1]

**File S3 Sensitivity analysis of the association between HBVIDV program and serological evidence of vaccine-mediated immunity in complete data set**

**Table S1.** Proportion of missing data

**Table S2.** Characteristic of total sample, original sample, propensity score-matched sample, and inverse probability of treatment-weighted sample

**Table S3.** Association between HBVIDV program and vaccine-mediated immunity

**Table S4.** Association between HBVIDV program and vaccine-mediated immunity in original sample, stratified by age and living area

**Table S5.** Association between HBVIDV program and vaccine-mediated immunity in propensity score-matched sample, stratified by age and living area

**Table S6.** Association between HBVIDV program and vaccine-mediated immunity in inverse probability of treatment-weighted sample, stratified by age and living area

**Table S1.** Proportion of missing data

| <b>Variables</b>                | <b>n</b> | <b>%</b> |
|---------------------------------|----------|----------|
| Education level                 | 9625     | 20       |
| Employment condition            | 8958     | 18.6     |
| Economic level                  | 9623     | 20       |
| Self-rated socioeconomic status | 9655     | 20       |
| Multimorbidity                  | 9638     | 20       |
| Self-rated health condition     | 9655     | 20       |

%=n/N. N was the number the number after excluding younger than 18 years old, past history of hepatitis B, and lack of blood test results, which is 48063.

**Table S2. Characteristic of total sample, original sample, propensity score-matched sample, and inverse probability of treatment-weighted sample**

| Characteristic                    | Total<br>sample<br>(N=38180) | Original sample                |                            |       | Propensity 1:1 Matching        |                              |       | IPTW sample                    |                            |       |
|-----------------------------------|------------------------------|--------------------------------|----------------------------|-------|--------------------------------|------------------------------|-------|--------------------------------|----------------------------|-------|
|                                   |                              | Treatment<br>group<br>(N=9621) | Control group<br>(N=28559) | SMD   | Treatment<br>group<br>(N=9621) | Control<br>group<br>(N=9621) | SMD   | Treatment<br>group<br>(N=9621) | Control group<br>(N=28559) | SMD   |
| Age group                         |                              |                                |                            | 0.373 |                                |                              | 0.035 |                                |                            | 0.032 |
| 18–34                             | 4653 (12.2)                  | 483 (5.02)                     | 4170 (14.6)                |       | 483 (5.02)                     | 534 (5.6)                    |       | 3448.6 (9.2)                   | 4675.1 (12.2)              |       |
| 35–44                             | 4656 (12.2)                  | 1045 (10.9)                    | 3611 (12.6)                |       | 1045 (10.9)                    | 1014 (10.5)                  |       | 5857.1 (15.7)                  | 4371.3 (11.4)              |       |
| 45–54                             | 8642 (22.6)                  | 2050 (21.3)                    | 6592 (23.1)                |       | 2050 (21.3)                    | 2036 (21.2)                  |       | 8639.1 (23.1)                  | 8567.5 (22.4)              |       |
| 55–64                             | 13691 (35.9)                 | 3656 (38.0)                    | 10035 (35.1)               |       | 3656 (38.0)                    | 3941 (41.0)                  |       | 11777.6 (31.6)                 | 14447.2 (37.8)             |       |
| ≥65                               | 6538 (17.1)                  | 2387 (24.8)                    | 4151 (14.5)                |       | 2387 (24.8)                    | 2096 (21.8)                  |       | 7607.9 (20.4)                  | 6170.2 (16.1)              |       |
| Gender, male                      | 14916 (39.1)                 | 3523 (36.6)                    | 11393 (39.9)               | 0.067 | 3523 (36.6)                    | 3375 (35.1)                  | 0.032 | 13464.2 (36.1)                 | 14834.6 (38.8)             |       |
| Education level                   |                              |                                |                            |       |                                |                              | 0.052 |                                |                            | 0.057 |
| Illiterate                        | 1001 (2.6)                   | 246 (2.6)                      | 755 (2.6)                  |       | 246 (2.6)                      | 223 (2.3)                    |       | 912.3 (2.4)                    | 999.7 (2.6)                | 0.040 |
| Primary school/Junior high school | 17275 (45.3)                 | 5045 (52.4)                    | 12230 (42.8)               |       | 5045 (52.4)                    | 4747 (49.3)                  |       | 16759.3 (44.9)                 | 17073.1 (44.7)             |       |
| Senior high school                | 11323 (29.7)                 | 2516 (26.2)                    | 8807 (30.8)                |       | 2516 (26.2)                    | 2772 (28.8)                  |       | 10155.2 (27.2)                 | 11677.4 (30.5)             |       |
| College graduate or above         | 8581 (22.5)                  | 1814 (18.9)                    | 6767 (23.7)                |       | 1814 (18.9)                    | 1879 (19.5)                  |       | 9503.6 (25.5)                  | 8481.1 (22.2)              |       |
| Employment condition              |                              |                                |                            | 0.264 |                                |                              | 0.010 |                                |                            | 0.042 |
| Working                           | 19262 (50.5)                 | 3747 (39.0)                    | 15515 (54.3)               |       | 3747 (39.0)                    | 3764 (39.1)                  |       | 18088.5 (48.5)                 | 19156.6 (50.1)             |       |
| Retired                           | 15764 (41.3)                 | 4959 (51.5)                    | 10805 (37.8)               |       | 4959 (51.5)                    | 5005 (52.0)                  |       | 15773.8 (42.3)                 | 15980.4 (41.8)             |       |
| Unemployed                        | 3082 (8.1)                   | 909 (9.5)                      | 2173 (7.6)                 |       | 909 (9.5)                      | 837 (8.7)                    |       | 3437.0 (9.2)                   | 3018.6 (7.9)               |       |
| Student                           | 72 (0.2)                     | 6 (0.1)                        | 66 (0.2)                   |       | 6 (0.1)                        | 15 (0.2)                     |       | 31.0 (0.1)                     | 75.8 (0.2)                 |       |

Continued

| Characteristic                  | Total sample<br>(N=38180) | Original sample   |                    |       | Propensity 1:1 Matching |                   |       | IPTW sample       |                |       |
|---------------------------------|---------------------------|-------------------|--------------------|-------|-------------------------|-------------------|-------|-------------------|----------------|-------|
|                                 |                           | Treatment         | Control            | SMD   | Treatment               | Control           | SMD   | Treatment         | Control group  | SMD   |
|                                 |                           | group<br>(N=9621) | group<br>(N=28559) |       | group<br>(N=9621)       | group<br>(N=9621) |       | group<br>(N=9621) | (N=28559)      |       |
| Economic level                  |                           |                   |                    | 0.010 |                         |                   | 0.017 |                   |                | 0.001 |
| Far below average               | 2240 (5.9)                | 492 (5.1)         | 1748 (6.1)         |       | 492 (5.1)               | 553 (5.8)         |       | 1972.9 (5.3)      | 2346.1 (6.1)   |       |
| Below average                   | 7109 (18.6)               | 1944 (20.2)       | 5165 (18.1)        |       | 1944 (20.2)             | 1715 (17.8)       |       | 7334.0 (19.7)     | 6918.4 (18.1)  |       |
| Average                         | 27741 (72.7)              | 6948 (72.2)       | 20793 (72.8)       |       | 6948 (72.2)             | 7125 (74.1)       |       | 27017.6 (72.4)    | 27866.5 (72.9) |       |
| Above average                   | 972 (2.6)                 | 207 (2.2)         | 765 (2.7)          |       | 207 (2.2)               | 198 (2.1)         |       | 908.0 (2.4)       | 984.7 (2.6)    |       |
| Far above average               | 118 (0.3)                 | 30 (0.3)          | 88 (0.3)           |       | 30 (0.3)                | 30 (0.3)          |       | 97.8 (0.3)        | 115.9 (0.3)    |       |
| Self-rated socioeconomic status |                           |                   |                    | 0.002 |                         |                   | 0.007 |                   |                | 0.001 |
| Higher                          | 1000 (2.6)                | 240 (2.5)         | 760 (2.7)          |       | 240 (2.5)               | 211 (2.2)         |       | 1078.3 (2.9)      | 991.7 (2.6)    |       |
| Equality                        | 29896 (78.3)              | 7564 (78.6)       | 22332 (78.2)       |       | 7564 (78.6)             | 7649 (79.5)       |       | 29062.2 (77.9)    | 29970.7 (78.4) |       |
| Lower                           | 7284 (19.1)               | 1817 (18.9)       | 5467 (19.1)        |       | 1817 (18.9)             | 1761 (18.3)       |       | 7189.8 (19.3)     | 7269.0 (19.0)  |       |
| Living area                     |                           |                   |                    | 0.587 |                         |                   | 0.009 |                   |                | 0.026 |
| Urban                           | 17978 (47.1)              | 2543 (26.4)       | 15435 (54.1)       |       | 2543 (26.4)             | 2507 (26.1)       |       | 17039.8 (45.7)    | 17955.8 (47.0) |       |
| Rural                           | 20202 (52.9)              | 7078 (73.6)       | 13124 (46.0)       |       | 7078 (73.6)             | 7114 (73.9)       |       | 20290.5 (54.4)    | 20275.6 (53.0) |       |
| Multimorbidity                  | 8033 (21.0)               | 2740 (28.5)       | 5293 (18.5)        | 0.236 | 2740 (28.5)             | 2671 (27.8)       | 0.016 | 8377.6 (22.4)     | 8090.2 (21.2)  | 0.031 |
| Self-rated health condition     |                           |                   |                    | 0.098 |                         |                   | 0.003 |                   |                | 0.026 |
| Very unhealthy                  | 986 (2.6)                 | 228 (2.4)         | 758 (2.7)          |       | 228 (2.4)               | 230 (2.4)         |       | 860.3 (2.3)       | 1019.3 (2.7)   |       |
| Unhealthy                       | 2605 (6.8)                | 695 (7.2)         | 1910 (6.7)         |       | 695 (7.2)               | 651 (6.8)         |       | 2663.3 (7.1)      | 2578.2 (6.7)   |       |
| Fair healthy                    | 122290 (32.2)             | 3545 (36.9)       | 8745 (30.6)        |       | 3545 (36.9)             | 3492 (36.3)       |       | 12929.1 (34.6)    | 12209.3 (31.9) |       |
| Healthy                         | 17786 (46.6)              | 4165 (43.3)       | 13621 (47.7)       |       | 4165 (43.3)             | 4373 (45.5)       |       | 16521.4 (44.3)    | 18024.7 (47.2) |       |
| Very healthy                    | 4513 (11.8)               | 988 (10.3)        | 3525 (12.3)        |       | 988 (10.3)              | 875 (9.1)         |       | 4356.2 (11.7)     | 4399.8 (11.5)  |       |

Abbreviations: SMD, standard mean difference; IPTW, inverse probability of treatment weighting. Categorical variables are reported as number (%).

**Table S3.** Association between HBVIDV program and vaccine-mediated immunity

|                                             | <b>Treatment group</b> | <b>Control group</b> | <b>OR (95% CI)</b>  | <b><i>p</i> Value</b> |
|---------------------------------------------|------------------------|----------------------|---------------------|-----------------------|
| Original sample unadjusted model            | 3537 (36.7)            | 8503 (29.8)          | 1.371 (1.306,1.440) | <0.0001               |
| Original sample adjusted model <sup>a</sup> | 3537 (36.7)            | 8503 (29.8)          | 1.651 (1.567,1.741) | <0.0001               |
| Propensity 1:1 Matching                     | 3537 (36.8)            | 2553 (26.5)          | 1.609 (1.514,1.711) | <0.0001               |
| IPTW sample                                 | 14711.1 (39.1)         | 11029.4 (28.7)       | 1.599 (1.551,1.648) | <0.0001               |

Abbreviations: OR (95% CI), Odds Ratio (95% Confidence Interval). IPTW, inverse probability of treatment weighting.

Outcome events (%) are reported.

<sup>a</sup>Model was adjusted for age, gender, educational level, employment condition, economic level, self-rated socioeconomic status, living area, multimorbidity, self-rated health condition.

**Table S4.** Association between HBVIDV program and vaccine-mediated immunity in original sample, stratified by age and living area

|                          | Treatment<br>group<br>(N=9621) | Control<br>group<br>(N=28559) | Unadjusted<br>OR (95% CI) | Adjusted<br>OR (95% CI) | <i>p</i> Value | <i>p</i> for<br>interaction |
|--------------------------|--------------------------------|-------------------------------|---------------------------|-------------------------|----------------|-----------------------------|
| Age <sup>a</sup>         |                                |                               |                           |                         |                | <0.0001                     |
|                          |                                |                               | 1.613<br>(1.332,1.954)    | 1.404<br>(1.140,1.729)  | 0.0014         |                             |
| 18–34                    | 289 (59.8)                     | 2002 (48.0)                   | 1.727<br>(1.502,1.985)    | 1.726<br>(1.484,2.007)  | <0.0001        |                             |
| 35–44                    | 492 (47.1)                     | 1228 (34.0)                   | 1.684<br>(1.513,1.874)    | 1.850<br>(1.649,2.076)  | <0.0001        |                             |
| 45–54                    | 712 (34.7)                     | 1583 (24.0)                   | 1.520<br>(1.400,1.650)    | 1.660<br>(1.522,1.810)  | <0.0001        |                             |
| 55–64                    | 1239 (33.9)                    | 2531 (25.2)                   | 1.314<br>(1.178,1.464)    | 1.427<br>(1.274,1.598)  | <0.0001        |                             |
| ≥65                      | 805 (33.7)                     | 1159 (27.9)                   |                           |                         |                |                             |
| Living area <sup>b</sup> |                                |                               |                           |                         |                | <0.0001                     |
|                          |                                |                               | 1.202<br>(1.101,1.312)    | 1.412<br>(1.287,1.549)  | <0.0001        |                             |
| Urban                    | 918 (36.1)                     | 4936 (32.0)                   | 1.574<br>(1.480,1.674)    | 1.755<br>(1.645,1.872)  | <0.0001        |                             |
| Rural                    | 2619 (37.0)                    | 3567 (27.2)                   |                           |                         |                |                             |

Outcome events (%) are reported.

<sup>a</sup>Model was adjusted for gender, educational level, employment condition, economic level, self-rated socioeconomic status, living area, multimorbidity, self-rated health condition.

<sup>b</sup>Model was adjusted for age, gender, educational level, employment condition, economic level, self-rated socioeconomic status, multimorbidity, self-rated health condition.

**Table S5.** Association between HBVIDV program and vaccine-mediated immunity in propensity score-matched sample, stratified by age and living area

|             | <b>Treatment group<br/>(n=9621)</b> | <b>Control group<br/>(n=9621)</b> | <b>OR (95% CI)</b>  | <b><i>p</i> Value</b> | <b><i>p</i> for<br/>interaction</b> |
|-------------|-------------------------------------|-----------------------------------|---------------------|-----------------------|-------------------------------------|
| Age         |                                     |                                   |                     |                       | <0.0001                             |
| 18–34       | 289 (59.8)                          | 281 (52.6)                        | 1.341 (1.046,1.720) | 0.0208                |                                     |
| 35–44       | 492 (47.1)                          | 348 (34.3)                        | 1.703 (1.426,2.034) | <0.0001               |                                     |
| 45–54       | 712 (34.7)                          | 463 (22.7)                        | 1.808 (1.575,2.075) | <0.0001               |                                     |
| 55–64       | 1239 (33.9)                         | 931 (23.6)                        | 1.657 (1.499,1.832) | <0.0001               |                                     |
| ≥65         | 805 (33.7)                          | 530 (25.3)                        | 1.503 (1.320,1.712) | <0.0001               |                                     |
| Living area |                                     |                                   |                     |                       | <0.0001                             |
| Urban       | 918 (36.1)                          | 735 (29.3)                        | 1.362 (1.210,1.533) | <0.0001               |                                     |
| Rural       | 2619 (37.0)                         | 1818 (25.6)                       | 1.711 (1.592,1.838) | <0.0001               |                                     |

Outcome events (%) are reported.

**Table S6.** Association between HBVIDV program and vaccine-mediated immunity in inverse probability of treatment-weighted sample, stratified by age and living area

|             | Treatment group<br>(N=9621) | Control group<br>(N=28559) | OR (95% CI)         | <i>p</i> Value | <i>p</i> for<br>interaction |
|-------------|-----------------------------|----------------------------|---------------------|----------------|-----------------------------|
| Age         |                             |                            |                     |                | <0.0001                     |
| 18–34       | 2108.0 (61.1)               | 2254.8 (48.2)              | 1.688 (1.544,1.845) | <0.0001        |                             |
| 35–44       | 2943.0 (50.3)               | 1487.9 (34.0)              | 1.957 (1.805,2.122) | <0.0001        |                             |
| 45–54       | 3118.0 (36.1)               | 2025.3 (23.6)              | 1.824 (1.707,1.949) | <0.0001        |                             |
| 55–64       | 3942.0 (33.5)               | 3568.2 (24.7)              | 1.534 (1.453,1.619) | <0.0001        |                             |
| ≥65         | 2565.3 (33.7)               | 1670.5 (27.1)              | 1.370 (1.273,1.475) | <0.0001        |                             |
| Living area |                             |                            |                     |                | <0.0001                     |
| Urban       | 6906.4 (40.5)               | 5658.2 (31.5)              | 1.481 (1.418,1.548) | <0.0001        |                             |
| Rural       | 7769.8 (38.3)               | 5348.5 (26.4)              | 1.732 (1.660,1.806) | <0.0001        |                             |

Outcome events (%) are reported
