# Supplementary material for: Effect of a Community-Based Hepatitis B Virus Infection Detection Combined with Vaccination Program in China
Source: MDPI journal article supplement (doi:10.3390/vaccines10010019), 2021-12-24
Supplement: s1 [file s1]

**File S1. Complete logistic regression results for subgroup analysis**

**Table S1.** Association between HBVIDV program and outcomes in original sample, stratified by age

**Table S2.** Association between HBVIDV program and outcomes in propensity score-matched sample, stratified by age

**Table S3.** Association between HBVIDV program and outcomes in inverse probability of treatment-weighted sample, stratified by age

**Table S4.** Association between HBVIDV program and outcomes in original sample, stratified by living area

**Table S5.** Association between HBVIDV program and outcomes in propensity score-matched sample, stratified by living area

**Table S6.** Association between HBVIDV program and outcomes in inverse probability of treatment-weighted sample, stratified by living area

**Table S1.** Association between HBVIDV program and outcomes in original sample, stratified by age

| Outcomes                                               | Age   | Treatment<br>group<br>(n=6160) | Control<br>group<br>(n=200020) | Unadjusted<br>OR (95% CI) | Adjusted<br>OR (95% CI) <sup>a</sup> | <i>p</i> Value |
|--------------------------------------------------------|-------|--------------------------------|--------------------------------|---------------------------|--------------------------------------|----------------|
| Hepatitis B<br>Vaccination<br>(≥1 Dose)                | 18–34 | 156 (62.9)                     | 867 (36.5)                     | 2.953<br>(2.252,3.871)    | 2.384<br>(1.759,3.230)               | <0.0001        |
|                                                        | 35–44 | 323 (53.5)                     | 747 (31.3)                     | 2.525<br>(2.105,3.028)    | 2.176<br>(1.782,2.657)               | <0.0001        |
|                                                        | 45–54 | 399 (32.2)                     | 843 (18.4)                     | 2.103<br>(1.828,2.421)    | 1.976<br>(1.697,2.301)               | <0.0001        |
|                                                        | 55–64 | 491 (20.5)                     | 915 (12.7)                     | 1.771<br>(1.569,1.999)    | 1.881<br>(1.649,2.145)               | <0.0001        |
|                                                        | ≥65   | 339 (20.3)                     | 407 (11.8)                     | 1.911<br>(1.632,2.238)    | 1.746<br>(1.463,2.084)               | <0.0001        |
|                                                        |       |                                |                                | 2.847                     | 2.186                                |                |
| Hepatitis B Vaccine<br>Series Completion<br>(≥3 Doses) | 18–34 | 131 (52.8)                     | 671 (28.2)                     | 2.367<br>(2.184,3.710)    | 1.999<br>(1.627,2.937)               | <0.0001        |
|                                                        | 35–44 | 267 (44.2)                     | 599 (25.1)                     | 2.239<br>(1.966,2.849)    | 2.108<br>(1.633,2.449)               | <0.0001        |
|                                                        | 45–54 | 320 (25.8)                     | 616 (13.4)                     | 1.640<br>(1.921,2.609)    | 1.759<br>(1.787,2.487)               | <0.0001        |
|                                                        | 55–64 | 344 (14.3)                     | 668 (9.3)                      | 1.852<br>(1.427,1.885)    | 1.683<br>(1.513,2.045)               | <0.0001        |
|                                                        | ≥65   | 238 (14.3)                     | 285 (8.3)                      | 1.795<br>(1.512,2.224)    | 1.656<br>(1.371,2.065)               | <0.0001        |
|                                                        |       |                                |                                | 1.755                     | 1.812                                |                |
| Vaccine-Mediated<br>Immunity                           | 18–34 | 160 (64.5)                     | 1196 (50.3)                    | 1.804<br>(1.367,2.357)    | 2.093<br>(1.238,2.216)               | <0.0001        |
|                                                        | 35–44 | 307 (50.8)                     | 885 (37.1)                     | 1.456<br>(1.467,2.101)    | 1.580<br>(1.494,2.197)               | <0.0001        |
|                                                        | 45–54 | 491 (39.6)                     | 1221 (26.6)                    | 1.230<br>(1.582,2.057)    | 1.379<br>(1.820,2.409)               | <0.0001        |
|                                                        | 55–64 | 825 (34.4)                     | 1909 (26.5)                    | 1.230<br>(1.319,1.608)    | 1.379<br>(1.418,1.761)               | <0.0001        |
|                                                        | ≥65   | 556 (33.4)                     | 999 (28.9)                     | 1.085<br>(1.085,1.394)    | 1.192<br>(1.192,1.595)               | <0.0001        |
|                                                        |       |                                |                                |                           |                                      |                |

Outcome events (%) are reported.

<sup>a</sup>Model was adjusted for gender, educational level, employment condition, economic level, self-rated socioeconomic status, living area, multimorbidity, self-rated health condition.

**Table S2.** Association between HBVIDV program and outcomes in propensity score-matched sample, stratified by age

| Outcomes            | Age   | Treatment group<br>(n=5793) | Control group<br>(n=5793) | OR<br>(95% CI)      | <i>p</i> Value |
|---------------------|-------|-----------------------------|---------------------------|---------------------|----------------|
| Hepatitis B         | 18–34 | 156 (62.9)                  | 123 (43.5)                | 2.206 (1.556,3.126) | <.0001         |
| Vaccination (≥1     | 35–44 | 323 (53.5)                  | 213 (36.3)                | 2.018 (1.600,2.546) | <.0001         |
| Dose)               | 45–54 | 399 (32.2)                  | 252 (19.1)                | 2.014 (1.679,2.415) | <.0001         |
|                     | 55–64 | 481 (21.7)                  | 288 (12.0)                | 2.023 (1.725,2.372) | <.0001         |
|                     | ≥65   | 322 (21.8)                  | 157 (13.1)                | 1.856 (1.507,2.286) | <.0001         |
| Hepatitis B Vaccine | 18–34 | 131 (52.8)                  | 89 (31.5)                 | 2.440 (1.713,3.476) | <.0001         |
| Series Completion   | 35–44 | 267 (44.2)                  | 173 (29.5)                | 1.896 (1.492,2.408) | <.0001         |
| (≥3 Doses)          | 45–54 | 320 (25.8)                  | 186 (14.1)                | 2.124 (1.738,2.596) | <.0001         |
|                     | 55–64 | 337 (15.2)                  | 209 (8.7)                 | 1.872 (1.558,2.248) | <.0001         |
|                     | ≥65   | 223 (15.1)                  | 104 (8.7)                 | 1.878 (1.468,2.402) | <.0001         |
| Vaccine-Mediated    | 18–34 | 160 (64.5)                  | 154 (54.4)                | 1.523 (1.073,2.161) | 0.0184         |
| Immunity            | 35–44 | 307 (50.8)                  | 216 (36.8)                | 1.775 (1.409,2.238) | <.0001         |
|                     | 45–54 | 491 (39.6)                  | 319 (24.1)                | 2.060 (1.739,2.441) | <.0001         |
|                     | 55–64 | 760 (34.2)                  | 600 (25.0)                | 1.557 (1.371,1.768) | <.0001         |
|                     | ≥65   | 493 (33.4)                  | 307 (25.5)                | 1.461 (1.234,1.729) | <.0001         |

Outcome events (%) are reported.

**Table S3.** Association between HBVIDV program and outcomes in inverse probability of treatment-weighted sample, stratified by age

| Outcomes                                            | Age   | Treatment group<br>(n=6160) | Control group<br>(n=20020) | OR<br>(95% CI)      | <i>p</i> Value |
|-----------------------------------------------------|-------|-----------------------------|----------------------------|---------------------|----------------|
| Hepatitis B Vaccination<br>(≥1 Dose)                | 18–34 | 1030.0 (49.9)               | 993.9 (37.0)               | 1.696 (1.509,1.905) | <0.0001        |
|                                                     | 35–44 | 1850.4 (42.5)               | 912.1 (32.0)               | 1.568 (1.420,1.732) | <0.0001        |
|                                                     | 45–54 | 1659.3 (23.6)               | 1094.1 (18.8)              | 1.329 (1.219,1.448) | <0.0001        |
|                                                     | 55–64 | 1623.0 (19.1)               | 1222.4 (12.5)              | 1.660 (1.531,1.799) | <0.0001        |
|                                                     | ≥65   | 1064.9 (19.6)               | 559.1 (11.8)               | 1.826 (1.635,2.040) | <0.0001        |
| Hepatitis B Vaccine Series<br>Completion (≥3 Doses) | 18–34 | 866.9 (42.0)                | 771.6 (28.8)               | 1.796 (1.592,2.027) | <0.0001        |
|                                                     | 35–44 | 1479.3 (34.0)               | 732.2 (25.7)               | 1.486 (1.338,1.651) | <0.0001        |
|                                                     | 45–54 | 1310.6 (18.6)               | 796.2 (13.7)               | 1.440 (1.308,1.585) | <0.0001        |
|                                                     | 55–64 | 1123.0 (13.2)               | 888.5 (9.1)                | 1.530 (1.394,1.679) | <0.0001        |
|                                                     | ≥65   | 735.4 (13.5)                | 391.9 (8.3)                | 1.740 (1.529,1.980) | <0.0001        |
| Vaccine-Mediated<br>Immunity                        | 18–34 | 1225.7 (59.4)               | 1352.2 (50.4)              | 1.442 (1.284,1.619) | <0.0001        |
|                                                     | 35–44 | 2336.8 (53.7)               | 1053.5 (37.0)              | 1.972 (1.791,2.173) | <0.0001        |
|                                                     | 45–54 | 3050.3 (43.3)               | 1515.7 (26.1)              | 2.164 (2.008,2.333) | <0.0001        |
|                                                     | 55–64 | 2868.6 (33.8)               | 2544.2 (26.0)              | 1.457 (1.367,1.552) | < 0.0001       |
|                                                     | ≥65   | 1847.4 (34.0)               | 1335.9 (28.2)              | 1.316 (1.209,1.432) | <0.0001        |

Outcome events (%) are reported.

**Table S4.** Association between HBVIDV program and outcomes in original sample, stratified by living area

| Outcomes                                               | Living area | Treatment group<br>(n=6160) | Control group<br>(n=200020) | Unadjusted<br>OR (95% CI) | Adjusted<br>OR (95% CI) <sup>a</sup> | p Value |
|--------------------------------------------------------|-------------|-----------------------------|-----------------------------|---------------------------|--------------------------------------|---------|
| Hepatitis B Vaccination<br>(≥1 Dose)                   | Urban       | 333 (20.1)                  | 1949 (20.5)                 | 0.971 (0.853,1.106)       | 1.160<br>(1.004,1.340)               | 0.0442  |
|                                                        | Rural       | 1375 (30.6)                 | 1830 (17.4)                 | 2.092 (1.929,2.269)       | 2.516<br>(2.298,2.756)               | <0.0001 |
| Hepatitis B Vaccine<br>Series Completion (≥3<br>Doses) | Urban       | 253 (15.2)                  | 1456 (15.3)                 | 0.992 (0.858,1.147)       | 1.210<br>(1.031,1.419)               | 0.0195  |
|                                                        | Rural       | 1047 (23.3)                 | 1383 (13.1)                 | 2.006 (1.834,2.193)       | 2.330<br>(2.110,2.574)               | <0.0001 |
| Vaccine-Mediated<br>Immunity                           | Urban       | 609 (36.7)                  | 3149 (33.2)                 | 1.167 (1.047,1.300)       | 1.440<br>(1.283,1.617)               | <0.0001 |
|                                                        | Rural       | 1730 (38.4)                 | 3061 (29.1)                 | 1.524 (1.416,1.640)       | 1.770<br>(1.632,1.919)               | <0.0001 |

Outcome events (%) are reported.

<sup>a</sup>Model was adjusted for age, gender, educational level, employment condition, economic level, self-rated socioeconomic status, multimorbidity, self-rated health condition.

**Table S5.** Association between HBVIDV program and outcomes in propensity score-matched sample, stratified by living area

| Outcomes                                            | Living area | Treatment group<br>(n=5793) | Control group<br>(n=5793) | OR<br>(95% CI)      | <i>p</i> Value |
|-----------------------------------------------------|-------------|-----------------------------|---------------------------|---------------------|----------------|
| Hepatitis B Vaccination (≥1 Dose)                   | Urban       | 333 (20.1)                  | 323 (19.5)                | 1.034 (0.872,1.227) | 0.7009         |
|                                                     | Rural       | 1348 (32.6)                 | 710 (17.2)                | 2.338 (2.107,2.593) | <0.0001        |
| Hepatitis B Vaccine Series Completion<br>(≥3 Doses) | Urban       | 253 (15.2)                  | 232 (14.0)                | 1.102 (0.909,1.337) | 0.3228         |
|                                                     | Rural       | 1025 (24.8)                 | 529 (12.8)                | 2.251 (2.005,2.526) | <0.0001        |
| Vaccine-Mediated Immunity                           | Urban       | 609 (36.7)                  | 502 (30.4)                | 1.330 (1.151,1.537) | 0.0001         |
|                                                     | Rural       | 1602 (38.8)                 | 1094 (26.4)               | 1.762 (1.605,1.934) | <0.0001        |

Outcome events (%) are reported.

**Table S6.** Association between HBVIDV program and outcomes in inverse probability of treatment-weighted sample, stratified by living area

| Outcomes                                         | Living area | Treatment group<br>(n=6160) | Control group<br>(n=20020) | OR<br>(95% CI)      | <i>p</i><br>Value |
|--------------------------------------------------|-------------|-----------------------------|----------------------------|---------------------|-------------------|
| Hepatitis B Vaccination (≥1 Dose)                | Urban       | 2387.6 (19.9)               | 2273.8 (20.4)              | 0.964 (0.904,1.028) | 0.2618            |
|                                                  | Rural       | 4840.0 (31.5)               | 2507.8 (17.0)              | 2.251 (2.131,2.378) | <0.0001           |
| Hepatitis B Vaccine Series Completion (≥3 Doses) | Urban       | 1820.7 (15.1)               | 1687.9 (15.2)              | 0.997 (0.928,1.071) | 0.9362            |
|                                                  | Rural       | 3694.5 (24.1)               | 1892.5 (12.8)              | 2.156 (2.029,2.291) | <0.0001           |
| Vaccine-Mediated Immunity                        | Urban       | 5119.6 (42.6)               | 3632.6 (32.7)              | 1.528 (1.448,1.612) | <0.0001           |
|                                                  | Rural       | 6209.1 (40.5)               | 4168.9 (28.2)              | 1.727 (1.645,1.812) | <0.0001           |

Outcome events (%) are reported.
